# Supplementary material for: Incidence Hypertension and Fasting Blood Glucose from Real-World Data: Retrospective Cohort for 7-Years Follow-Up
Source: PubMed Central journal article supplement (PMC7924835; doi:10.3390/ijerph18042085), 2021-02-21
Supplement: ijerph-18-02085-s001.pdf [file ijerph-18-02085-s001.pdf]

**Supplementary Table S1.** Adjusted Hazard ratio of incident hypertension by baseline characteristics.

| <b>Variables</b>                           | <b>aHR</b> | <b>95%CI</b> | <b>p-Value</b> |
|--------------------------------------------|------------|--------------|----------------|
| <b>Sex</b>                                 |            |              |                |
| Men                                        | Ref        |              |                |
| Women                                      | 1.059      | 1.049–1.069  | <0.0001        |
| <b>Age (years)</b>                         | 1.063      | 1.063–1.063  | <0.0001        |
| <b>Fasting blood glucose level (mg/dl)</b> |            |              |                |
| <100                                       | Ref        |              |                |
| 100–125                                    | 1.249      | 1.237–1.260  | <0.0001        |
| ≥126                                       | 1.836      | 1.810–1.862  | <0.0001        |
| <b>Blood pressure group</b>                |            |              |                |
| Normotensive                               | Ref        |              |                |
| Pre-hypertensive                           | 1.964      | 1.948–1.979  | <0.0001        |
| <b>BMI (kg/m<sup>2</sup>)</b>              | 1.091      | 1.089–1.092  | <0.0001        |
| <b>Waist circumference(cm)</b>             |            |              |                |
| Men <90, Women <85                         | Ref        |              |                |
| Men ≥90, Women ≥85                         | 1.174      | 1.162–1.186  | <0.0001        |
| <b>Triglyceride (mg/dl)</b>                |            |              |                |
| <150                                       | Ref        |              |                |
| ≥150                                       | 1.292      | 1.280–1.303  | <0.0001        |
| <b>HDL (mg/dl)</b>                         |            |              |                |
| Men <40, Women <50                         | Ref        |              |                |
| Men ≥40, Women ≥50                         | 1.046      | 1.036–1.057  | <0.0001        |
| <b>History of diabetes mellitus</b>        |            |              |                |
| No                                         | Ref        |              |                |
| Yes                                        | 1.635      | 1.605–1.666  | <0.0001        |
| <b>History of Dyslipidemia</b>             |            |              |                |
| No                                         | Ref        |              |                |
| Yes                                        | 1.279      | 1.253–1.305  | <0.0001        |
| <b>Metabolic syndrome</b>                  |            |              |                |
| No                                         | Ref        |              |                |
| Yes                                        | 1.208      | 1.195–1.222  | <0.0001        |
| <b>Current smoking</b>                     |            |              |                |
| No                                         | Ref        |              |                |
| Yes                                        | 1.076      | 1.068–1.084  | <0.0001        |
| <b>High risk alcohol drinking</b>          |            |              |                |
| No                                         | Ref        |              |                |
| Yes                                        | 1.203      | 1.192–1.214  | <0.0001        |
| <b>Optimal exercise</b>                    |            |              |                |
| No                                         | Ref        |              |                |
| Yes                                        | 1.015      | 1.007–1.024  | 0.0002         |
| <b>Household income</b>                    |            |              |                |
| 1Q (lowest)                                | Ref        |              |                |
| 2Q                                         | 0.985      | 0.973–0.996  | 0.0087         |
| 3Q                                         | 0.976      | 0.966–0.987  | <0.0001        |
| 4Q                                         | 0.961      | 0.951–0.971  | <0.0001        |
| 5Q (highest)                               | 0.911      | 0.902–0.921  | <0.0001        |

Abbreviations: BMI = body mass index; HDL = high-density lipoprotein cholesterol; aHR = adjusted Hazard Ratio; CI = Confidence Interval; Ref = Reference.
